# Supplementary material for: MALDI-TOF Mass Spectrometry-Based Optochin Susceptibility Testing for Differentiation of Streptococcus pneumoniae from other Streptococcus mitis Group Streptococci
Source: MDPI journal article supplement (doi:10.3390/microorganisms9102010), 2021-09-23
Supplement: s1 [file s1]

**MALDI-TOF mass spectrometry-based optochin susceptibility testing for differentiation of *Streptococcus pneumoniae* from other *Streptococcus mitis* group streptococci**

Ilka D. Nix, Evgeny A. Idelevich, Andreas Schlattmann, Katrin Sparbier,  
Markus Kostrzewa, Karsten Becker

**Supplementary Materials**

**Table S1.**

Results of molecular/biochemical species identification and bile solubility/optochin disk diffusion for the development set of isolates ( $n=13$ ).

**Table S2.**

Results of molecular/biochemical species identification and bile solubility/optochin disk diffusion for the test set of isolates ( $n=24$ ).

**Table S3.**

Results of optochin minimum inhibitory concentration (MIC) for the development set ( $n=13$ ) and the test set ( $n=24$ ) isolates.

**Table S1.** Results of molecular/biochemical species identification and bile solubility/optochin disk diffusion for the development set of isolates ( $n=13$ ).

|                 | #                                      | Molecular identification                          |                           |             |            | Biochemical identification (VITEK 2)                      |                                                                   |                                  | Bile solubility      |            |                      |            |               | Optochin disk diffusion                   |        |                                                    |        |
|-----------------|----------------------------------------|---------------------------------------------------|---------------------------|-------------|------------|-----------------------------------------------------------|-------------------------------------------------------------------|----------------------------------|----------------------|------------|----------------------|------------|---------------|-------------------------------------------|--------|----------------------------------------------------|--------|
|                 |                                        |                                                   |                           |             |            |                                                           |                                                                   |                                  | Tube test<br>McF 0.5 |            | Tube test<br>McF 4.0 |            | Plate<br>test | Incubation at 35<br>± 1 °C in ambient air |        | Incubation at 35<br>± 1 °C with 5% CO <sub>2</sub> |        |
|                 |                                        | <i>sodA</i> sequencing                            | <i>rpoB</i><br>sequencing | <i>lytA</i> | <i>ply</i> | Species                                                   | Qualifying<br>message (%<br>probability)                          | Time to<br>result [h]            | 30<br>min            | 3<br>hours | 30<br>min            | 3<br>hours |               | Inhibition<br>zone [mm]                   | Result | Inhibition<br>zone [mm]                            | Result |
| Development set | 2P                                     | <i>S. pneumoniae</i> /<br><i>pseudopneumoniae</i> | <i>S. pneumoniae</i>      | +           | +          | <i>Streptococcus pneumoniae</i>                           | Excellent (97)                                                    | 5.00                             | +                    | +          | +                    | +          | +             | 28                                        | S      | 20                                                 | S      |
|                 | 5P                                     | <i>S. pneumoniae</i> /<br><i>pseudopneumoniae</i> | <i>S. pneumoniae</i>      | +           | +          | <i>Streptococcus pneumoniae</i>                           | Very good (94)                                                    | 5.98                             | +                    | +          | +                    | +          | +             | 32                                        | S      | 22                                                 | S      |
|                 | 6P                                     | <i>S. pneumoniae</i> /<br><i>pseudopneumoniae</i> | <i>S. pneumoniae</i>      | +           | +          | <i>Streptococcus pneumoniae</i>                           | Good (91)                                                         | 6.05                             | +                    | +          | +                    | +          | +             | 26                                        | S      | 24                                                 | S      |
|                 | 8P                                     | <i>S. pneumoniae</i> /<br><i>pseudopneumoniae</i> | <i>S. pneumoniae</i>      | +           | +          | <i>Streptococcus pneumoniae</i>                           | Good (92)                                                         | 6.77                             | +                    | +          | +                    | +          | +             | 28                                        | S      | 21                                                 | S      |
|                 | 1M                                     | <i>S. mitis</i>                                   | ND                        | -           | -          | <i>Streptococcus mitis/oralis</i>                         | Good (91)                                                         | 7.02                             | -                    | -          | -                    | -          | -             | -                                         | R      | -                                                  | R      |
|                 | 3M                                     | <i>S. mitis</i>                                   | ND                        | -           | -          | <i>Streptococcus mitis/oralis</i>                         | Very good (93)                                                    | 5.80                             | ~                    | ~          | ~                    | +          | -             | -                                         | R      | -                                                  | R      |
|                 | 4M                                     | <i>S. oralis</i>                                  | ND                        | -           | -          | <i>Streptococcus mitis/oralis</i>                         | Excellent (99)                                                    | 5.07                             | -                    | -          | -                    | -          | -             | -                                         | R      | -                                                  | R      |
|                 | 5M                                     | <i>S. oralis</i>                                  | ND                        | -           | -          | <i>Streptococcus mitis/oralis</i>                         | Excellent (98)                                                    | 5.07                             | -                    | -          | -                    | -          | -             | -                                         | R      | -                                                  | R      |
|                 | <i>S. pneumoniae</i><br>DSM20566       | ND                                                | ND                        | ND          | ND         | <i>Streptococcus pneumoniae</i>                           | Very good (93)                                                    | 4.98                             | -                    | -          | +                    | +          | -             | 28                                        | S      | 26                                                 | S      |
|                 | <i>S. mitis</i><br>DSM12643            | ND                                                | ND                        | ND          | ND         | <i>Streptococcus mitis/oralis</i>                         | Good (91)                                                         | 5.97                             | -                    | -          | -                    | -          | -             | -                                         | R      | -                                                  | R      |
|                 | <i>S. pseudopneumoniae</i><br>DSM18670 | ND                                                | ND                        | ND          | ND         | Low<br>discrimination<br>(repeated test:<br>unidentified) | Low<br>discrimination<br>(50) (repeated<br>test:<br>unidentified) | 7.90<br>(repeated<br>test: 2.83) | -                    | -          | -                    | -          | ?             | 32                                        | S      | 20                                                 | S      |
|                 | <i>S. oralis</i><br>DSM20627           | ND                                                | ND                        | ND          | ND         | <i>Streptococcus mitis/oralis</i>                         | Excellent (97)                                                    | 5.97                             | -                    | -          | -                    | -          | -             | -                                         | R      | -                                                  | R      |
|                 | <i>S. pneumoniae</i><br>ATCC49619      | ND                                                | ND                        | ND          | ND         | <i>Streptococcus pneumoniae</i>                           | Excellent (97)                                                    | 2.57                             | +                    | +          | +                    | +          | +             | 22                                        | S      | 22                                                 | S      |

+, positive; -, negative; ~, almost transparent (ambiguous result); ND, not done; ?, not readable/unclear result; R, resistant; S, susceptible

**Table S2.** Results of molecular/biochemical species identification and bile solubility/optochin disk diffusion for the test set of isolates (n=24).

|          | #    | Molecular identification                          |                        |             |            | Biochemical identification (VITEK 2) |                                          |                       | Bile solubility      |            |                      |            |               | Optochin disk diffusion                   |        |                                                    |        |
|----------|------|---------------------------------------------------|------------------------|-------------|------------|--------------------------------------|------------------------------------------|-----------------------|----------------------|------------|----------------------|------------|---------------|-------------------------------------------|--------|----------------------------------------------------|--------|
|          |      |                                                   |                        |             |            |                                      |                                          |                       | Tube test<br>McF 0.5 |            | Tube test<br>McF 4.0 |            | Plate<br>test | Incubation at 35<br>± 1 °C in ambient air |        | Incubation at 35<br>± 1 °C with 5% CO <sub>2</sub> |        |
|          |      | <i>sodA</i> sequencing                            | <i>rpoB</i> sequencing | <i>lytA</i> | <i>ply</i> | Species                              | Qualifying<br>message (%<br>probability) | Time to<br>result [h] | 30<br>min            | 3<br>hours | 30<br>min            | 3<br>hours |               | Inhibition<br>zone [mm]                   | Result | Inhibition<br>zone [mm]                            | Result |
| Test set | R2P  | <i>S. pneumoniae</i> /<br><i>pseudopneumoniae</i> | <i>S. pneumoniae</i>   | +           | +          | <i>Streptococcus pneumoniae</i>      | Very good (93)                           | 5.78                  | +                    | +          | +                    | +          | +             | 24                                        | S      | 24                                                 | S      |
|          | R3P  | <i>S. pneumoniae</i> /<br><i>pseudopneumoniae</i> | <i>S. pneumoniae</i>   | +           | +          | <i>Streptococcus pneumoniae</i>      | Excellent (97)                           | 4.83                  | +                    | +          | +                    | +          | +             | 27                                        | S      | 25                                                 | S      |
|          | R5P  | <i>S. pneumoniae</i> /<br><i>pseudopneumoniae</i> | <i>S. pneumoniae</i>   | +           | +          | <i>Streptococcus pneumoniae</i>      | Excellent (99)                           | 4.78                  | +                    | +          | +                    | +          | +             | 23                                        | S      | 18                                                 | S      |
|          | R6P  | <i>S. pneumoniae</i> /<br><i>pseudopneumoniae</i> | <i>S. pneumoniae</i>   | +           | +          | <i>Streptococcus pneumoniae</i>      | Excellent (99)                           | 4.82                  | +                    | +          | ?                    | ~          | +             | 24                                        | S      | 14                                                 | R (?)  |
|          | R8P  | <i>S. pneumoniae</i> /<br><i>pseudopneumoniae</i> | <i>S. pneumoniae</i>   | +           | +          | <i>Streptococcus pneumoniae</i>      | Excellent (97)                           | 5.03                  | +                    | +          | +                    | +          | +             | 23                                        | S      | 23                                                 | S      |
|          | R10P | <i>S. pneumoniae</i> /<br><i>pseudopneumoniae</i> | <i>S. pneumoniae</i>   | +           | +          | <i>Streptococcus pneumoniae</i>      | Very good (94)                           | 5.03                  | +                    | +          | +                    | +          | +             | 23                                        | S      | 21                                                 | S      |
|          | R11P | <i>S. pneumoniae</i> /<br><i>pseudopneumoniae</i> | <i>S. pneumoniae</i>   | +           | +          | <i>Streptococcus pneumoniae</i>      | Excellent (97)                           | 3.32                  | ?                    | +          | -                    | ~          | +             | 28                                        | S      | 22                                                 | S      |
|          | R13P | <i>S. pneumoniae</i> /<br><i>pseudopneumoniae</i> | <i>S. pneumoniae</i>   | +           | +          | <i>Streptococcus pneumoniae</i>      | Good (91)                                | 5.77                  | +                    | +          | +                    | +          | +             | 29                                        | S      | 25                                                 | S      |
|          | R14P | <i>S. pneumoniae</i> /<br><i>pseudopneumoniae</i> | <i>S. pneumoniae</i>   | +           | +          | <i>Streptococcus pneumoniae</i>      | Very good (93)                           | 5.98                  | +                    | +          | +                    | +          | +             | 32                                        | S      | 22                                                 | S      |
|          | R15P | <i>S. pneumoniae</i> /<br><i>pseudopneumoniae</i> | <i>S. pneumoniae</i>   | +           | +          | <i>Streptococcus pneumoniae</i>      | Very good (94)                           | 5.98                  | ?                    | +          | +                    | +          | +             | 25                                        | S      | 25                                                 | S      |
|          | R16P | <i>S. pneumoniae</i> /<br><i>pseudopneumoniae</i> | <i>S. pneumoniae</i>   | +           | +          | <i>Streptococcus pneumoniae</i>      | Very good (95)                           | 6                     | ?                    | +          | +                    | +          | +             | 30                                        | S      | 22                                                 | S      |
|          | R17P | <i>S. pneumoniae</i> /<br><i>pseudopneumoniae</i> | <i>S. pneumoniae</i>   | +           | +          | <i>Streptococcus pneumoniae</i>      | Very good (95)                           | 4.78                  | ?                    | +          | +                    | +          | ?             | 28                                        | S      | 25                                                 | S      |

+, positive; -, negative; ~, almost transparent (ambiguous result); ND, not done; ?, not readable/unclear result; R, resistant; S, susceptible

**Table S2 (continuation).** Results of molecular/biochemical species identification and bile solubility/optochin disk diffusion for the test set of isolates ( $n=24$ ).

|          | #    | Molecular identification                          |                                      |             |            | Biochemical identification (VITEK 2)                                 |                                                                   |                                  | Bile solubility      |            |                      |            |               | Optochin disk diffusion                   |        |                                                    |        |
|----------|------|---------------------------------------------------|--------------------------------------|-------------|------------|----------------------------------------------------------------------|-------------------------------------------------------------------|----------------------------------|----------------------|------------|----------------------|------------|---------------|-------------------------------------------|--------|----------------------------------------------------|--------|
|          |      |                                                   |                                      |             |            |                                                                      |                                                                   |                                  | Tube test<br>McF 0.5 |            | Tube test<br>McF 4.0 |            | Plate<br>test | Incubation at 35<br>± 1 °C in ambient air |        | Incubation at 35<br>± 1 °C with 5% CO <sub>2</sub> |        |
|          |      | <i>sodA</i> sequencing                            | <i>rpoB</i> sequencing               | <i>lytA</i> | <i>ply</i> | Species                                                              | Qualifying<br>message (%<br>probability)                          | Time to<br>result [h]            | 30<br>min            | 3<br>hours | 30<br>min            | 3<br>hours |               | Inhibition<br>zone [mm]                   | Result | Inhibition<br>zone [mm]                            | Result |
| Test set | R1P  | <i>S. pneumoniae</i> /<br><i>pseudopneumoniae</i> | <i>S.</i><br><i>pseudopneumoniae</i> | -           | +          | Low<br>discrimination<br>(repeated test:<br>unidentified)            | Low<br>discrimination<br>(50) (repeated<br>test:<br>unidentified) | 7.90<br>(repeated<br>test: 3.32) | ?                    | ?          | -                    | +          | ?             | 24                                        | S      | 13                                                 | R (?)  |
|          | R12P | <i>S. pneumoniae</i> /<br><i>pseudopneumoniae</i> | <i>S.</i><br><i>pseudopneumoniae</i> | -           | +          | <i>Streptococcus</i><br><i>pneumoniae</i>                            | Very good (93)                                                    | 6.98                             | +                    | +          | ~                    | ~          | ?             | 25                                        | S      | 22                                                 | S      |
|          | R2M  | <i>S. mitis</i>                                   | ND                                   | -           | -          | <i>Streptococcus</i><br><i>mitis/oralis</i>                          | Excellent (98)                                                    | 5.78                             | -                    | -          | -                    | -          | -             | -                                         | R      | -                                                  | R      |
|          | R5M  | <i>S. mitis</i>                                   | ND                                   | -           | -          | <i>Streptococcus</i><br><i>mitis/oralis</i>                          | Very good (95)                                                    | 6.97                             | -                    | -          | -                    | -          | -             | -                                         | R      | -                                                  | R      |
|          | R6M  | <i>S. mitis</i>                                   | ND                                   | -           | -          | <i>Streptococcus</i><br><i>mitis/oralis</i>                          | Excellent (99)                                                    | 4.8                              | -                    | -          | -                    | -          | -             | -                                         | R      | -                                                  | R      |
|          | R7M  | <i>S. mitis</i>                                   | ND                                   | -           | -          | <i>Streptococcus</i><br><i>mitis/oralis</i>                          | Very good (94)                                                    | 5.03                             | -                    | -          | -                    | -          | -             | -                                         | R      | -                                                  | R      |
|          | R9M  | <i>S. oralis</i>                                  | ND                                   | -           | -          | <i>Streptococcus</i><br><i>mitis/oralis</i>                          | Excellent (98)                                                    | 5.02                             | -                    | -          | -                    | -          | -             | -                                         | R      | -                                                  | R      |
|          | R11M | <i>S. mitis</i>                                   | ND                                   | -           | -          | <i>Streptococcus</i><br><i>mitis/oralis</i>                          | Excellent (99)                                                    | 4.82                             | -                    | -          | -                    | -          | -             | -                                         | R      | -                                                  | R      |
|          | R12M | <i>S. mitis</i>                                   | ND                                   | -           | -          | <i>Streptococcus</i><br><i>mitis/oralis</i>                          | Very good (95)                                                    | 5.78                             | -                    | -          | -                    | -          | -             | -                                         | R      | -                                                  | R      |
|          | R15M | <i>S. parasanguinis</i> /<br><i>cristatus</i>     | ND                                   | -           | -          | Low<br>discrimination<br>(repeated test:<br><i>S. thoraltensis</i> ) | Low<br>discrimination<br>(50) (repeated<br>test: 95)              | 7.93<br>(repeated<br>test: 2.58) | -                    | -          | -                    | -          | -             | -                                         | R      | -                                                  | R      |
|          | R16M | <i>S. mitis</i>                                   | ND                                   | -           | -          | <i>Streptococcus</i><br><i>mitis/oralis</i>                          | Excellent (99)                                                    | 5.05                             | -                    | -          | -                    | -          | -             | -                                         | R      | -                                                  | R      |
|          | R18M | <i>S. mitis</i>                                   | ND                                   | -           | -          | <i>Streptococcus</i><br><i>mitis/oralis</i>                          | Excellent (99)                                                    | 5.03                             | -                    | -          | -                    | -          | -             | -                                         | R      | -                                                  | R      |

+, positive; -, negative; ~, almost transparent (ambiguous result); ND, not done; ?, not readable/unclear result; R, resistant; S, susceptible

**Table S3.** Results of optochin minimum inhibitory concentration (MIC) for the development set ( $n=13$ ) and the test set ( $n=24$ ) isolates.

|                 | #         | Species                            | MIC ( $\mu\text{g/ml}$ ) |
|-----------------|-----------|------------------------------------|--------------------------|
| Development set | 2P        | <i>S. pneumoniae</i>               | 0.5                      |
|                 | 5P        | <i>S. pneumoniae</i>               | 0.25                     |
|                 | 6P        | <i>S. pneumoniae</i>               | 0.25                     |
|                 | 8P        | <i>S. pneumoniae</i>               | 0.25                     |
|                 | 1M        | <i>S. mitis</i>                    | 32                       |
|                 | 3M        | <i>S. mitis</i>                    | 32                       |
|                 | 4M        | <i>S. oralis</i>                   | 64                       |
|                 | 5M        | <i>S. oralis</i>                   | 128                      |
|                 | DSM20566  | <i>S. pneumoniae</i>               | 0.5                      |
|                 | DSM12643  | <i>S. mitis</i>                    | 8                        |
|                 | DSM18670  | <i>S. pseudopneumoniae</i>         | 0.5                      |
|                 | DSM20627  | <i>S. oralis</i>                   | 32                       |
|                 | ATCC49619 | <i>S. pneumoniae</i>               | 0.5                      |
| Test set        | R2P       | <i>S. pneumoniae</i>               | 1                        |
|                 | R3P       | <i>S. pneumoniae</i>               | 0.25                     |
|                 | R5P       | <i>S. pneumoniae</i>               | 1                        |
|                 | R6P       | <i>S. pneumoniae</i>               | 1                        |
|                 | R8P       | <i>S. pneumoniae</i>               | 0.5                      |
|                 | R10P      | <i>S. pneumoniae</i>               | 1                        |
|                 | R11P      | <i>S. pneumoniae</i>               | 0.25                     |
|                 | R13P      | <i>S. pneumoniae</i>               | 0.5                      |
|                 | R14P      | <i>S. pneumoniae</i>               | 0.5                      |
|                 | R15P      | <i>S. pneumoniae</i>               | 4                        |
|                 | R16P      | <i>S. pneumoniae</i>               | 0.25                     |
|                 | R17P      | <i>S. pneumoniae</i>               | 0.25                     |
|                 | R1P       | <i>S. pseudopneumoniae</i>         | 1                        |
|                 | R12P      | <i>S. pseudopneumoniae</i>         | 0.5                      |
|                 | R2M       | <i>S. mitis</i>                    | 64                       |
|                 | R5M       | <i>S. mitis</i>                    | 32                       |
|                 | R6M       | <i>S. mitis</i>                    | 64                       |
|                 | R7M       | <i>S. mitis</i>                    | 256                      |
|                 | R9M       | <i>S. oralis</i>                   | 256                      |
|                 | R11M      | <i>S. mitis</i>                    | 32                       |
|                 | R12M      | <i>S. mitis</i>                    | 64                       |
|                 | R15M      | <i>S. parasanguinis/ cristatus</i> | 128                      |
|                 | R16M      | <i>S. mitis</i>                    | 32                       |
|                 | R18M      | <i>S. mitis</i>                    | 4                        |
